# Supplementary material
Source: publisher figshare collection journal article supplement (https://gsapubs.figshare.com/articles/dataset/_/17139236)
Supplement: Supplementary file 1 [file 1]

## Sheet: St. Audrie's Bay
Sample Information, Bulk Isotopes, Total Organic Carbon										Rock-Eval Information															Stratification, Redox and PZE Biomarkers										Total Aryl Isoprenoids and Carotenoids			Hopane and Sterane Biomarkers								Compound-Specific Isotopes
Sample			Depth original (cm)	Depth correlated to Lilstock (cm)		d13Corg (‰)	d13Corg (‰) sandstone samples	Total Organic Carbon (%)		Qty - (mg)	S1 - (mg/g)	S2 - (mg/g)	S3 - (mg/g)	PI	Tmax (°C)	HI	OI	TOC (%)	MINC (%)		Sample		Depth correlated to Lilstock (cm)		pristane/phytane ratio	Homohopane Index	Aryl Isoprenoid Ratio	Gammacerane Index (%)	(okenane/TAS) *1000	(chlorobactane/TAS) * 1000	(isorenieratane/TAS) *1000	(β-isorenieratane/TAS) *1000	isoreniratane/ okeanen + chlorobactane		(Σaryl Isoprenoids/TAS) * 1000	(ΣC40 carotenoids/TAS) * 1000		C31 2α Methylhopane Index (%)	C31 3β Methylhopane Index	C27 Steranes	C28 Steranes	C29 Steranes	C30 Diateranes	Hopanes Vs. Steranes		d13C Pristane (‰)	Pristane Error		d13C Phytane (‰)
SAB 5/5/11	27		768	371.502		-28.8936		6.14		46	1.11	29.42	0.45	0.04	421	689	11	4.27	2.91		SAB 5/5/11	27	371.502		0.592821	14.465	0.807227	28.3112	18.2211	19.8634	572.825	27.8561	15.0409		125.33	638.766		4.00342	1.10988	24.0901	23.0556	52.8543	3.64605	57.5817		-30.351	0.789236		-28.6573
SAB 5/5/11	26		756	361.099		-27.5399		0.81		69.8	0.01	0.42	0.5	0.02	421	95	114	0.44	5.24		SAB 5/5/11	26	361.099		#DIV/0!	16.2272	0.436945	5.80683	0.637399	0.597468	11.7087	1.22373	9.48174		114.29	14.1673		1.01026	5.65211	34.1674	19.1315	46.7012	1.52202	37.2451		-33.477	0.739183		-34.526
SAB 5/5/11	25		745.25	351.779		-27.7057		0.8		72.5	0	0.05	0.1	0.08	422	45	91	0.11	6.09		SAB 5/5/11	25	351.779		0.978547	19.7707		5.71971	0.0308486	0.0154964	1.61205	0.226232	34.7837		69.36	1.88463		1.13271	7.71912	35.5867	18.8353	45.5781	1.8346	29.4043		-30.3223	0.145232		-30.3447
SAB 5/5/11	24		737	344.627		-28.2369		0.63		72.6	0.01	0.17	0.55	0.05	423	57	183	0.3	6.81		SAB 5/5/11	24	344.627		1.26024	15.6168		2.41179	0.129984	0.0952463	1.07513	0.642622	4.77347		123.12	1.94298		1.88081	6.79041	31.5794	17.0076	51.4129	1.35997	30.27		N/A	N/A		N/A
SAB 5/5/11	23		731	339.426		-28.4573		0.78		68.3	0	0.01	0.03	0.12	428	17	50	0.06	6.05		SAB 5/5/11	23	339.426		1.03153	19.2962		2.78333	0.271063	0.261661	3.54622	2.01712	6.65676		103.3	6.09606		2.18182	5.97963	29.8535	15.6639	54.4826	1.49258	28.8798		-31.7257	0.730021		-33.032
SAB 5/5/11	23a		726.5	335.525																	SAB 5/5/11	23a	335.525										#DIV/0!													N/A	N/A		N/A
SAB 5/5/11	22		718	328.156		-27.3299		0.55		86.7	0	0.03	0.34	0.07	423	19	212	0.16	5.79		SAB 5/5/11	22	328.156		1.42118	21.3613		2.68616	0.195775	0.0935823	1.22401	0.547591	4.23008		27.24	2.06096		1.38135	7.72252	24.7353	17.953	57.3117	1.63207	22.6719		-31.3163	0.252953		-31.515
SAB 5/5/11	21		701	313.418		-28.0394		0.58		76	0	0.04	0.21	0.1	423	24	124	0.17	6.17		SAB 5/5/11	21	313.418		1.50362	22.241		2.75668	0.365631	0.109458	1.59826	0.534268	3.36413		29.76	2.60762		1.30513	7.86187	32.8156	16.5318	50.6525	1.65096	27.3157		-32.3153	0.794862		-32.266
SAB 5/5/11	20		687	301.281		-28.177		0.61		108.3	0	0.08	0.32	0.04	426	31	123	0.26	4.95		SAB 5/5/11	20	301.281		1.23347	21.5848		3.86275	0.421577	0.11935	1.65413	0.799771	3.05795		39.18	2.99482		1.32049	6.63343	39.2864	18.9982	41.7154	2.00271	26.1857		-33.2477	1.8561		-32.467
SAB 5/5/11	19		675.5	291.312		-28.6704		0.95		90.9	0.01	0.73	0.53	0.02	429	152	110	0.48	5.85		SAB 5/5/11	19	291.312		1.03473	13.6588		8.74571	8.83267	1.23555	22.2639	2.56278	2.2113		15.7	34.8949		0.832643	2.39791	32.0038	19.1389	48.8573	1.48749	37.8938		-33.2007	0.262148		-33.219
SAB 5/5/11	18		665.5	282.643		-25.1143		0.53		65.7	0	0.02	0.46	0.03	427	11	256	0.18	6.99		SAB 5/5/11	18	282.643		0.578193	9.76451		12.2613	#VALUE!	#VALUE!	0.0331113	0.162158	#VALUE!		1.66	0.195269		0.401404	0.798237	22.507	20.4583	57.0347	0.247997	41.901		-32.6003	0.321573		-32.0593
SAB 5/5/11	17		657	275.274		-28.9709		0.66		60.5	0	0.12	0.52	0	426	38	162	0.32	8.03		SAB 5/5/11	17	275.274		0.629645	10.7237		22.1228	0.0623224	0.303982	0.0525369	0.597853	0.143424		1.85	1.01669		0.536724	0.83595	22.7489	24.4008	52.8503	0.185494	47.1638		-32.0987	0.380474		-31.434
SAB 5/5/11	16		640.5	260.97		-28.2938		0.69		59.66	0	0.05	0.18	0	427	45	164	0.11	7.22		SAB 5/5/11	16	260.97		0.673923	9.16311		14.7177	0.276771	0.787988	0.396355	7.27108	0.372249		9.74	8.7322		0.495538	1.2941	20.657	20.0436	59.2994	0.424245	50.693		-32.3517	0.435546		-32.852
SAB 5/5/11	15		614	242.404		-29.3994		0.5		64.36	0	0.28	0.7	0.01	426	44	109	0.64	3.68		SAB 5/5/11	15	242.404		0.853044	13.0436		7.53122	0.170467	0.703678	0.061136	0.871181	0.069938		2.72	1.80646		2.63408	2.67661	17.788	14.228	67.984	0.540823	51.2001		-32.6677	0.361378		-33.492
SAB 5/5/11	14		594	230.944			-26.0881	0.24													SAB 5/5/11	14	230.944		0.577674	11.5814		4.42493	0.198867	0.226587	9.62182	0.484698	22.6154		39.1	10.532		2.55913	2.40179	32.4118	14.3535	53.2347	0.702695	18.7573		-32.6677	0.361378		-34.7633
SAB 5/5/11	13		586.5	226.646		-30.1556		0.29													SAB 5/5/11	13	226.646										#DIV/0!													N/A	N/A		N/A
SAB 5/5/11	12		575.5	220.343			-26.2262	0.25													SAB 5/5/11	12	220.343		0.536432	7.83735		2.61116	0.661097	0.518327	19.1791	1.18206	16.2614		109.29	21.5406		2.30826	1.39515	30.7051	13.0807	56.2142	0.518026	18.8223		-32.46	1.53867		-34.4217
SAB 5/5/11	11		562	212.607		-28.1366		0.22													SAB 5/5/11	11	212.607		0.721414	11.1562		2.8232	0.0303414	0.025771	2.20917	0.178279	39.3704		90.7	2.44356		3.16263	1.88553	24.16	17.0125	58.8274	0.472202	25.3396		N/A	N/A		-33.3033
SAB 5/5/11	10		556	209.169			-20.6887	0.19													SAB 5/5/11	10	209.169		0.736728	8.94298		3.94671	0.0501005	0.0659025	5.87814	0.150683	50.6723		121.97	6.14482		2.62126	1.92542	28.7511	16.3196	54.9292	0.791534	23.318		-31.6363	0.56608		-31.2285
SAB 5/5/11	9		547.5	204.298		-25.0359		0.15													SAB 5/5/11	9	204.298		0.768435	8.94298		3.94671	0.0295903	0.0249495	2.67584	0.0413387	49.0622		98.48	2.77172		2.62126	1.92542	28.7511	16.3196	54.9292	0.791534	23.318		-30.686	0.772343		-29.6457
SAB 5/5/11	8c		530	186.2			-27.12	0.21													SAB 5/5/11	8c	186.232		1.10225	16.1336		4.81144	0.0510971	0.0484537	7.17186	0.132807						1.37536	2.28291	25.1873	16.4321	58.3806	0.515341	27.2758
SAB 5/5/11	8b		510	158.7			-26.55	0.13													SAB 5/5/11	8ab	144.928		1.182	15.6344		6.77724	0.107371	0.162164	14.6502	0.319533						1.16868	2.57885	24.4929	18.1696	57.3376	0.636146	33.5322
SAB 5/5/11	8a		490	131.2			-23.77	0.25													SAB 5/5/11	7	105.688		0.880948	17.0308		5.7776	0.0256912	0.0387323	22.7139	0.868943						1.95308	2.34298	29.1734	19.8411	50.9855	0.766902	32.6232
SAB 5/5/11	7		471.5	105.7		-25.32		0.31													SAB 5/5/11	6	66.4493		1.2627	14.2557		8.38473	0.472486	0.356552	40.9899	1.94706						1.53658	3.50764	43.9565	11.5923	44.4512	0.780582	40.4196
SAB 5/5/11	6		443	66.4		-24.97		0.1													SAB 5/5/11	3	28.587		1.92215	11.7963		9.5792	0.655809	0.381465	31.2596	3.09394						2.01059	4.76245	19.1087	14.1749	66.7164	0.801213	40.2108
SAB 5/5/11	3		415.5	28.6		-23.63		0.14													SAB 5/5/11	5	16.1957			9.75628		16.3992	0.0156276	0.0716363	62.934	1.57605						1.96327	3.47181	19.0525	9.21218	71.7353	0.612937	60.6738
SAB 5/5/11	5		406.5	16.2		-26.93		0.98		59.17	0	0.23	0.17	0.02	426	70	52	0.33	7.27		SAB 5/5/11	4	12.0652		1.1068	8.59585		15.7363	0.358399	0.432286	34.2266	5.04683						2.00988	2.72851	18.8591	8.61104	72.5298	0.514762	59.2939
SAB 5/5/11	4		403.5	12.1		-27.15		1.12		62.2	0	0.35	0.6	0.01	422	73	125	0.48	6.9		SAB 3/2/17	1	7		0.815469	11.1236		21.6661	0.116424	0.174384	81.9055	1.76731						2.98301	4.56005	26.2808	11.4652	62.254	0.863688	53.3516
SAB 3/2/17	1		399	7		-26.6928		1.42899		58.73	0	0.06	0	0.01	431	67	0	0.09	6.51		SAB 3/2/17	2	-3.5		1.0096	11.9944		12.6435	0.68508	0.894877	122.997	2.98055						0.577949	5.33167	42.2527	22.3026	35.4447	2.46508	35.3243
SAB 3/2/17	2		388.5	-3.5		-26.3951		1.36929		66.2	0.05	2.48	0.12	0.02	431	216	10	1.15	0.41		SAB 3/2/17	3	-17.5			8.53411		10.1291	0.44112	0.212164	57.3377	1.56887						0.607192	4.8737	44.1195	23.1287	32.7519	2.26788	33.5001
SAB 3/2/17	3		374.5	-17.5		-26.2008		1.13247		62.48	0.04	1.44	0.15	0.03	429	152	16	0.95	0.35		SAB 3/2/17	4	-29		1.31236	8.89705		11.5445	0.366201	0.629644	56.0999	2.56439						0.46005	4.60287	56.7626	12.585	30.6523	2.06789	30.1954
SAB 3/2/17	4		363	-29		-26.3426		1.37765													SAB 3/2/17	5	-38		1.28722	8.2122		11.7875	0.187302	0.37155	41.7261	2.80873						0.50536	4.4536	50.0675	15.5647	34.3678	2.10942	35.6898
SAB 3/2/17	5		354	-38		-26.5298		1.43717		62.88	0.05	2.94	0.09	0.02	431	230	7	1.28	0.26		SAB 3/2/17	6	-49.5		1.36964	7.51915		9.06329	0.215123	0.193796	56.2733	1.90429						1.39919	5.51303	40.9469	20.1733	38.8798	2.51976	31.5117
SAB 3/2/17	6		342.5	-49.5		-26.097		1.02634		60.55	0.03	1.13	0.11	0.02	427	130	13	0.87	0.36		SAB 3/2/17	7	-62		1.21053	9.10377		8.25856	0.316024	0.292505	62.4799	2.84752						0.882604	5.9361	39.8082	21.8311	38.3607	2.2741	34.7494
SAB 3/2/17	7		330	-62		-26.1911		0.985934		64.6	0.03	1.03	0.1	0.03	428	121	12	0.85	0.38		SAB 3/2/17	8	-74.5		1.04746	7.8374		8.80848	0.0568517	0.119771	67.8666	1.3186						0.869865	5.98772	39.1819	21.1832	39.635	2.15286	31.7399
SAB 3/2/17	8		317.5	-74.5		-25.9847		0.993351		76.99	0	0.06	0.03	0.05	424	50	25	0.12	5.39		SAB 3/2/17	9	-89		1.65285	4.24649		5.89455	0.137856	0.144677	15.1014	1.25627						1.16024	8.08141	40.1908	20.7064	39.1028	2.51604	25.5795
SAB 3/2/17	9		303	-89		-26.1812		0.977996		63.33	0.02	0.86	0.14	0.03	429	96	16	0.9	0.57		SAB 3/2/17	10	-102.5		1.43049	5.58917		4.91958	0.748931	1.09113	263.89	4.35263						1.09659	5.38103	41.3056	21.8987	36.7957	2.83469	30.1158
SAB 3/2/17	10		289.5	-102.5		-26.6073		1.3592		91.65	0.04	2.09	0.34	0.02	428	170	28	1.23	0.66		SAB 3/2/17	11	-114		1.43574	5.83629		5.33984	4.47135	0.742597	109.109	3.40825						0.236685	6.13282	43.4557	20.7544	35.7898	2.67259	32.5884
SAB 3/2/17	11		278	-114		-26.2001		1.21569		93.35	0.03	1.47	0.22	0.02	430	136	20	1.08	0.63		SAB 3/2/17	12	-125.5		1.51139	5.39944		8.03228	0.654678	0.466404	113.834	2.45308						0.606359	4.74634	42.2746	21.4292	36.2962	2.02933	29.2159
SAB 3/2/17	12		266.5	-125.5		-26.4286		1.29057		75.05	0	0.19	0.06	0.02	433	100	32	0.19	5.88		SAB 3/2/17	13	-140.5		#DIV/0!	4.85178		6.3231	0.481425	0.379073	95.1918	1.80217						0.48918	4.94912	42.4234	21.2548	36.3218	2.02062	25.9579
SAB 3/2/17	13		251.5	-140.5		-26.4359		1.22566		77.62	0	0.21	0.08	0.02	431	95	36	0.22	5.74		SAB 3/4/17	12	-155		2.23657	2.03485		3.68156	0.06258	0.165224	32.9935	0.502708						0.700134	4.91649	42.0664	20.1539	37.7797	1.85256	23.0549
SAB 3/4/17	12		237	-155		-25.4018		0.665331		65.3	0.01	0.34	0.23	0.03	426	47	32	0.72	0.99		SAB 3/4/17	13	-168.5		2.10112	1.53681		4.06466	0.0747859	0.066349	6.78412	0.294556						1.02495	6.05049	37.6236	19.8593	42.5171	2.14101	14.7937
SAB 3/4/17	13		223.5	-168.5		-25.0235		0.623177		69.77	0.01	0.23	0.19	0.05	428	34	28	0.68	0.72		SAB 3/4/17	14	-182.5		2.2243	2.00156		5.37343	0.0341107	0.10359	9.50211	0.454881						0.596431	4.15115	42.1233	14.597	43.2798	2.05745	25.7809
SAB 3/4/17	14		209.5	-182.5		-25.8827		0.829175		66.39	0.01	0.64	0.1	0.02	429	76	12	0.84	0.45		SAB 3/4/17	15	-198.5		2.14219	1.67251		4.75987	0.0906334	0.18391	10.4666	0.623094						0.766544	3.30736	39.6034	11.4073	48.9892	1.48327	20.9731
SAB 3/4/17	15		193.5	-198.5		-26.7814		1.20403		95.22	0.02	1.32	0.06	0.02	430	120	5	1.1	0.12		SAB 3/4/17	16	-211		1.93731	2.28851		5.1857	0.0882203	0.0978486	35.395	0.856307						0.455667	3.70494	43.9822	18.0897	37.9282	1.4869	18.879
SAB 3/4/17	16		181	-211		-26.5879		1.00369		98.64	0.01	0.47	0.31	0.03	428	85	56	0.55	4.96		SAB 3/4/17	17	-222		2.34224	2.00796		4.30172	0.0112615	0.0318706	22.7619	0.367646						0.310707	3.76741	54.567	13.9997	31.4333	1.44131	19.6649
SAB 3/4/17	17		170	-222		-26.7875		1.24525		81.54	0.03	1.68	0.17	0.02	435	144	15	1.17	0.43		SAB 3/4/17	18	-237.5		1.84863	3.07074		6.72348	0.25929	0.139412	24.6996	0.62383						0.59762	3.87059	35.788	17.6386	46.5734	2.09148	31.7599
SAB 3/4/17	18		154.5	-237.5		-26.3441		1.13198		57.61	0.02	1.21	0.1	0.01	429	114	9	1.06	0.37		SAB 3/4/17	19	-247		1.5747	3.99917		7.1568	0.540182	0.166746	29.5103	0.823189						0.417527	3.54934	35.279	15.7093	49.0117	2.06036	34.8872
SAB 3/4/17	19		145	-247		-26.3632		1.07008		83.68	0	0.11	0.04	0	432	69	25	0.16	5.07		SAB 3/4/17	20	-257.5		1.91366	3.29196		7.58091	0.0894313	0.102277	20.5909	0.632474						1.88084	2.56484	39.5686	17.8401	42.5912	2.2288	24.6819
SAB 3/4/17	20		134.5	-257.5		-26.5619		1.2853		95.78	0.02	1.58	0.19	0.01	432	152	18	1.04	2.72		SAB 3/4/17	21	-274		2.06354	2.87246		6.72154										0.33864	2.9187	45.6591	16.4257	37.9152	2.3001	20.5751
SAB 3/4/17	21		118	-274		-27.0595		1.52483		55.46	0.04	3.09	0.07	0.01	435	216	5	1.43	0.28		SAB 3/4/17	22	-290.5		1.89774	3.0188		5.05858	0.0048422	0.00461479	27.4492	0.100091						0.331192	2.9411	38.2488	18.7146	43.0366	1.53554	21.4583
SAB 3/4/17	22		101.5	-290.5		-26.6514		1.20192		51.65	0.02	1.42	0.17	0.02	432	135	16	1.05	0.96		SAB 3/4/17	23	-306.5		1.69414	5.33975		8.29695	0.155944	0.481235	143.255	2.48557						0.486957	3.31268	42.9213	21.0441	36.0346	1.40389	32.0249
SAB 3/4/17	23		85.5	-306.5		-26.4489		1.20488		65.08	0	0.15	0.1	0.01	426	75	50	0.2	6.72		SAB 3/4/17	24	-320		1.67553	4.66837		5.20886	0.0358055	0.210004	70.0711	1.58606						0.47712	4.05451	42.9471	19.463	37.5899	1.67959	25.9264
SAB 3/4/17	24		72	-320		-26.8848		1.07764		62.81	0.03	1.02	0.41	0.02	429	116	47	0.88	2.64		SAB 3/4/17	25	-333.5		2.02848	3.78512		4.87005	0.0525967	0.522817	5.22679	1.52745						1.44723	6.56825	58.5951	17.832	23.5729	3.10901	17.1433
SAB 3/4/17	25		58.5	-333.5		-28.5837		2.59852		61.52	0.1	5.76	0.03	0.02	431	253	1	2.28	0.06		SAB 3/4/17	26	-349.5		1.67007	3.64955		6.14914	0.0276418	0.431158	4.00901	1.7786						0.646963	5.02774	66.1622	15.5892	18.2487	1.67926	19.5656
SAB 3/4/17	26		42.5	-349.5		-28.5805		2.03463		59.07	0.07	3.76	0.02	0.02	434	202	1	1.86	0.08		SAB 3/4/17	27	-365		1.50248	4.49781		5.87942	0.0388201	0.352548	19.2137	2.1901						0.215954	7.02492	67.0022	15.4015	17.5963	1.17004	20.2192
SAB 3/4/17	27		27	-365		-28.8388		2.66446		57.47	0.12	8.76	0.09	0.01	432	367	4	2.39	0.12		SAB 3/4/17	28	-374.5		1.38127	4.74844		7.04187	0.0281905	0.474228	12.8576	2.34274						0.412553	5.15527	74.0501	12.1078	13.842	0.730114	23.3759
SAB 3/4/17	28		17.5	-374.5		-28.2985		1.99396		46.5	0.09	5.88	0.07	0.02	430	318	4	1.85	0.14		SAB 3/4/17	29	-384.5		1.32539	5.41097		6.46908	0.0124011	0.0558545	35.312	0.680435						0.428384	4.03267	63.585	15.3895	21.0255	1.22051	23.8364
SAB 3/4/17	29		7.5	-384.5		-28.7146		2.45751		69.67	0.11	7.34	0.09	0.01	431	346	4	2.12	0.15
[truncated: 3 more columns]

## Sheet: Lilstock
Sample Information, Bulk Isotopes, Total Organic Carbon									Rock-Eval Information															Stratification, Redox and PZE Biomarkers										Total Aryl Isoprenoids and Carotenoids			Hopane and Sterane Biomarkers								Compound-Specific Isotopes
Sample			Depth original (cm)		d13Corg (‰)	d13Corg (‰) sandstone samples	Total Organic Carbon (%)		Qty - (mg)	S1 - (mg/g)	S2 - (mg/g)	S3 - (mg/g)	PI	Tmax (°C)	HI	OI	TOC (%)	MINC (%)		Sample		Depth original (cm)		pristane/phytane ratio	Homohopane Index (%)	Aryl Isoprenoid Ratio	Gammacerane Index (%)	(okenane/TAS) *1000	(chlorobactane/TAS) * 1000	(isorenieratane/TAS) *1000	(β-isorenieratane/TAS) *1000	isoreniratane/ okeanen + chlorobactane		(Σaryl Isoprenoids/TAS) * 1000	(ΣC40 carotenoids/TAS) * 1000		C31 2α Methylhopane Index (%)	C31 3β Methylhopane Index	C27 Steranes	C28 Steranes	C29 Steranes	C30 Diateranes	Hopanes Vs. Steranes		d13C Pristane (‰)	Pristane Error		d13C Phytane (‰)	Phytane Error
LIL 11/19/15 17	17		478.55		-26.2372		9.73481		34.2	0.58	19.89	0.79	0.03	431	533	21	3.73	6.94		LIL 11/19/15 17	17	478.55		0.684435	13.2392	0.31732	28.8864	2.03157	3.05697	821.348	17.4837	161.412		226.069	843.92		0.616567	1.89686	29.3152	26.0048	44.68	4.07452	54.5055		-31.733	0.428507		-28.6967	0.844987
LIL 11/19/15 16 Sats+Aroms	16		470.8		-26.5032		7.20229		58.87	0.73	18.06	0.84	0.04	427	559	26	3.23	6.29		LIL 11/19/15 16 Sats+Aroms	16	470.8		0.610392	12.2173	0.165334	30.6814	2.40734	4.66731	1059.34	25.0898	149.738		209.55	1091.51		0.699089	2.87424	30.7986	25.6264	43.575	3.84307	54.5266		-31.615	0.881333		-29.2283	0.797405
LIL 11/19/15 15 Sats+Aroms	15		464.3		-26.4559		4.81952		68.53	0.31	8.07	0.78	0.04	428	423	41	1.91	6.97		LIL 11/19/15 15 Sats+Aroms	15	464.3		0.610287	12.7748	0.251753	27.9549	6.9462	7.00374	946.508	26.035	67.8503		245.181	986.493		0.862591	1.68662	31.5096	24.7809	43.7095	3.60224	50.3343		-28.7837	0.278698		-27.018	0.034641
LIL 11/19/15 14 Sats+Aroms	14		458.3		-26.525		5.22236		51.61	0.3	7.37	0.32	0.04	431	515	22	1.43	8.12		LIL 11/19/15 14 Sats+Aroms	14	458.3		0.562926	11.4572	0.238988	25.8058	1.42657	2.40346	818.848	11.4359	213.797		272.009	834.114		0.949361	1.18517	29.6381	25.6098	44.7521	3.66444	51.7696		-28.8755	0.771485		-26.8392	0.752014
LIL 11/19/15 13 Sats+Aroms	13		450.3		-26.3081		6.95391		57.11	0.49	15.87	0.86	0.03	426	533	29	2.98	6.44		LIL 11/19/15 13 Sats+Aroms	13	450.3		0.553049	12.4411	0.241178	22.4534	5.64638	7.01809	795.067	27.0247	62.7793		219.594	834.757		0.855249	0.871493	29.0515	24.5571	46.3914	4.17008	55.6773		-28.3166	0.629064		-26.104	0.311099
LIL 11/19/15 12 Sats+Aroms	12		436.8		-27.1376		6.44768		51.79	0.5	12.84	0.53	0.04	426	535	22	2.4	6.69		LIL 11/19/15 12 Sats+Aroms	12	436.8		0.576907	12.6615	0.236768	19.4554	5.79489	7.74278	854.821	25.7941	63.1439		196.722	894.153		1.31465	1.07322	29.2646	24.6003	46.1351	4.8272	51.8132		-28.9573	0.232384		-26.813	0.27681
LIL 11/19/15 11 Sats+Aroms	11		419.05		-27.4336		5.50726		40.89	0.39	10.73	0.45	0.04	427	511	21	2.1	7.05		LIL 11/19/15 11 Sats+Aroms	11	419.05		0.615615	12.3294	0.31805	16.5131	5.00559	6.80836	719.261	19.5299	60.8824		202.784	750.605		1.5807	0.771212	29.1678	24.713	46.1192	5.33688	48.0727		-28.988	0.383395		-27.0574	0.634916
LIL 11/19/15 10 Sats+Aroms	10		407.8		-26.9884		4.98504		77.39	0.34	12.5	0.65	0.03	429	553	29	2.26	6.28		LIL 11/19/15 10 Sats+Aroms	10	407.8		0.582873	13.1097	0.363708	21.4185	1.78807	5.55229	600.029	17.55	81.7438		176.452	624.919		1.34244	1.23279	28.1673	23.4457	48.387	3.82667	49.8113		-29.304	0.379009		-27.9063	0.380114
LIL 11/19/15 09 Sats+Aroms	9		402.8		-27.1893		6.04676		62.81	0.47	15	0.56	0.03	425	577	22	2.6	6.41		LIL 11/19/15 09 Sats+Aroms	9	402.8		0.65532	13.272	0.395911	22.823	2.26034	5.1465	522.482	15.2934	70.5405		180.189	545.183		1.28967	1.02949	27.8685	23.5394	48.5921	4.00525	48.4444		-29.071	0.0255147		-27.0017	0.0595175
LIL 11/19/15 08 Sats+Aroms	8		399.9		-27.1962		6.19458		65.38	0.38	8.72	0.32	0.04	422	545	20	1.6	7.38		LIL 11/19/15 08 Sats+Aroms	8	399.9		0.584053	13.5493	0.309528	21.3679	6.27548	8.91641	748.374	26.6794	49.2614		180.814	790.245		1.10205	1.26286	29.0754	24.9358	45.9887	3.89451	48.7603		-29.662	0.583274		-27.2024	0.782994
LIL 11/19/15 07 Sats+Aroms	7		399		-27.5197		6.79676		63.87	0.88	24.86	0.75	0.03	425	609	18	4.08	4.43		LIL 11/19/15 07 Sats+Aroms	7	399		0.637695	12.1987	0.390259	21.2307	5.24078	6.30894	467.769	17.5042	40.5004		228.742	496.823		0.870509	1.22481	29.9327	25.1942	44.873	3.93504	50.3406		-29.2642	0.348278		-27.1935	0.594781
LIL 11/19/15 06 Sats+Aroms	6		397.25		-28.66		1.36921		65.3	0.04	0.8	0.45	0.04	427	163	92	0.49	7.06		LIL 11/19/15 06 Sats+Aroms	6	397.25		0.669192	#DIV/0!	0.249603	16.4534	#DIV/0!	#DIV/0!	#DIV/0!	#DIV/0!	#DIV/0!		167.242			2.55324	2.55537					#DIV/0!		-31.9087	0.489545		-31.255	0.936164
LIL 11/19/15 05 Sats+Aroms	5		391		-28.5255		7.29764		71.24	1.17	25.14	0.49	0.04	423	632	12	3.98	3.28		LIL 11/19/15 05 Sats+Aroms	5	391		0.679085	11.4445	0.591338	23.3879	19.0265	14.936	389.663	20.5198	11.4733		154.341	444.145		5.53224	0.859722	28.4087	23.3771	48.2142	4.46766	34.3294		-33.6463	1.03185		-31.6773	0.204552
LIL 11/19/15 04 Sats+Aroms	4		382.5		-27.9327		6.3824		100.46	1.12	27.18	0.5	0.04	425	640	12	4.25	3.64		LIL 11/19/15 04 Sats+Aroms	4	382.5		0.695517	10.5076	0.677512	22.8662	21.4491	13.2732	312.146	17.5933	8.98979		154.014	364.461		5.41521	0.862636	27.4431	23.3633	49.1935	4.55649	34.5972		-32.0175	0.62942		-29.9998	0.646103
LIL 11/19/15 03 Sats+Aroms	3		376.5		-29.1124		5.36189		59.45	0.98	24.28	0.58	0.04	420	631	15	3.85	2.83		LIL 11/19/15 03 Sats+Aroms	3	376.5		0.682641	11.21	0.518822	22.563	26.9389	16.2147	347.038	21.193	8.04193		127.267	411.385		5.88831	0.655814	23.2733	23.4709	53.2559	5.85521	34.8529		-34.1715	0.241123		-31.836	0.219427
LIL 11/19/15 02 Sats+Aroms	2		371.75		-29.0099		5.81067		90.92	1.14	23.55	0.47	0.05	426	658	13	3.58	4.28		LIL 11/19/15 02 Sats+Aroms	2	371.75		0.68165	10.7029	0.502937	21.6034	30.0288	18.3052	364.307	23.112	7.53729		125.311	435.753		5.77427	0.850623	24.5031	22.7002	52.7966	4.89387	34.5107		-34.495	0.384036		-31.213	0.375671
LIL 11/19/15 01 Sats+Aroms	1		367.25		-28.9896		5.7026		75.1	1.14	22.51	0.26	0.05	425	672	8	3.35	4.02		LIL 11/19/15 01 Sats+Aroms	1	367.25		0.672837	10.8717	0.511296	22.6051	30.8583	16.9833	357.079	23.1373	7.46377		127.091	428.058		5.88467	0.882746	23.0785	23.6114	53.3101	5.80841	33.3942		-31.7803	0.455544		-30.7163	0.621753
LIL 11/18/15 50 Sats+Aroms	50		360.5		-27.5191		0.657274		57.62	0.01	0.19	0.55	0.05	423	54	157	0.35	5.5		LIL 11/18/15 50 Sats+Aroms	50	360.5		0.887319	12.5695	0.538123	2.61385	0.152131	0.111216	1.24114	0.497496	4.71295		162.676	2.00199		2.84023	5.32832	34.8124	16.1945	48.9931	2.10375	20.0117		-31.5593	0.266635		-30.84	0.145165
LIL 11/18/15 49 Sats+Aroms	49		355.25		-28.1566		0.713715		67.04	0.01	0.05	0.1	0.14	418	42	83	0.12	6.76		LIL 11/18/15 49 Sats+Aroms	49	355.25		0.973203	13.8062	0.393561	2.16653	0.126342	0.119532	1.54103	0.503422	6.26756		126.221	2.29033		4.05031	6.6144	31.0775	16.9243	51.9982	2.15885	14.841
LIL 11/18/15 48 Sats+Aroms	48		349.5		-28.4736		0.660193		82.22	0	0.04	0.07	0.03	426	44	78	0.09	5.35		LIL 11/18/15 48 Sats+Aroms	48	349.5		0.951907	13.4388		1.80231	0.0675972	0.0875887	1.14311	0.483679	7.36608		102.69	1.78198		2.7376	5.14874	33.2352	13.7107	53.0541	2.00363	12.5215
LIL 11/18/15 47 Sats+Aroms	47		339		-28.5872		0.691008		82.52	0	0.03	0.18	0.04	427	60	360	0.05	5.43		LIL 11/18/15 47 Sats+Aroms	47	339		1.00281	14.0656		1.91606	0.134934	0.104155	1.99101	0.688334	8.3275		90.2395	2.91843		3.57161	6.76377	33.0149	13.8438	53.1414	2.26654	12.9518		-32.9543	0.119274		-33.509	1.0542
LIL 11/18/15 46 Sats+Aroms	46		323.5		-27.9546		0.602539		75.64	0.03	1.56	0.63	0.02	433	306	124	0.51	7.01		LIL 11/18/15 46 Sats+Aroms	46	323.5		0.854282	11.6467	0.316442	18.3702	0	22.1354	442.049	13.7813	19.9702		134.573	477.965		1.65049	3.54576	30.484	23.0033	46.5127	3.3643	43.8004		-32.0677	0.0827736		-31.2673	0.422358
LIL 11/18/15 45 Sats+Aroms	45		306		-27.9665		0.53249		72.58	0.01	0.11	0.71	0.05	421	23	148	0.48	6.38		LIL 11/18/15 45 Sats+Aroms	45	306		1.27381	16.1641		2.94378	0	0	0.620766	0.175016	#DIV/0!		19.6486	0.795782		2.75828	5.51236	26.6768	14.0509	59.2723	2.20676	20.187
LIL 11/18/15 44 Sats+Aroms	44		298		-28.2661		0.393766		106.84	0.01	0.06	0.29	0.08	419	33	161	0.18	5.29		LIL 11/18/15 44 Sats+Aroms	44	298		1.21792	15.9565		3.3473	0.449431	0.0955558	3.08306	0.268832	5.65713		14.5755	3.89688		2.89492	6.0316	33.5145	15.7684	50.717	2.39963	15.4939		-32.33	0.174158		-31.3073	0.193738
LIL 11/18/15 43 Sats+Aroms	43		293		-27.3211		0.55873		72.4	0	0.11	0.36	0.02	419	46	150	0.24	6.56		LIL 11/18/15 43 Sats+Aroms	43	293		1.22108	14.9862		3.02643	0.0807535	0.0334127	0.725818	0.220553	6.35756		19.5114	1.06054		2.96283	5.5175	35.1933	15.5923	49.2143	2.3067	14.6982
LIL 11/18/15 42 Sats+Aroms	42		287.5		-25.9222		0.542972		101.09	0	0.04	0.12	0.02	423	44	133	0.09	4.75		LIL 11/18/15 42 Sats+Aroms	42	287.5		1.09284	14.2836		3.10819	0.0738124	0.0515532	0.55354	0.497367	4.41541		11.6307	1.17627		2.36103	6.5142	34.8847	15.48	49.6353	2.1792	14.5126		-32.323	0.102825		-31.912	0.239192
LIL 11/18/15 41 Sats+Aroms	41		285		-28.5821		0.7198		63.21	0	0.05	0.42	0.08	418	20	168	0.25	6.97		LIL 11/18/15 41 Sats+Aroms	41	285		0.97539	13.3248		2.69205	0.0305124	0.130653	8.89734	0.310859	55.2064		129.834	9.36936		2.50095	6.07901	29.4648	23.198	47.3371	3.13165	30.3553
LIL 11/18/15 40 Sats+Aroms	40		282		-27.9345		0.706243		56.1	0.01	0.44	0.34	0.03	423	80	62	0.55	2.56		LIL 11/18/15 40 Sats+Aroms	40	282		1.14011	12.3279		5.28036	1.22293	0.18529	4.79468	0.583811	3.40479		16.33	6.7867		2.1187	3.84329	33.2026	16.3432	50.4542	2.03514	16.5616		-32.715	0.0385097		-32.664	0.339147
LIL 11/18/15 39 Sats+Aroms	39		280		-29.4681		0.716469		53.7	0	0.21	0.23	0.01	431	58	64	0.36	6.74		LIL 11/18/15 39 Sats+Aroms	39	280		1.05901	8.38659		8.7656	0.0859342	0.345559	0.108953	0.892566	0.252502		2.65274	1.43301		0.741062	0.910267	25.1863	19.543	55.2708	0.300132	23.4365		-32.7057	0.0516269		-32.423	0.076922
LIL 11/18/15 38 Sats+Aroms	38		277.5		-28.3809		0.610888		112.51	0	0.05	0.08	0.06	433	42	67	0.12	4.33		LIL 11/18/15 38 Sats+Aroms	38	277.5		0.762866	8.18819		7.70396	0.0266985	0.101365	0.0672942	0.315252	0.525476		1.31804	0.510609		0.456198	0.742334	21.6293	19.2506	59.1201	0.211579	17.9502		-32.6322	0.196903		-32.9633	0.251949
LIL 11/18/15 37 Sats+Aroms	37		275		-29.5006		0.729712		63.05	0.01	0.28	0.28	0.03	431	93	93	0.3	6.37		LIL 11/18/15 37 Sats+Aroms	37	275		0.935322	9.9549		14.1032	0.0126742	0.187291	0.0665327	0.472588	0.332722		1.44138	0.739086		0.631451	0.899002	18.8555	20.7142	60.4303	0.188491	25.6133		-32.2593	0.210443		-31.6847	0.170506
LIL 11/18/15 36 Sats+Aroms	36		272.5		-28.307		0.69941		117.66	0	0.04	0.11	0.03	432	50	138	0.08	4.44		LIL 11/18/15 36 Sats+Aroms	36	272.5		0.734456	8.34396		14.5555	0.020022	0.100006	0.0569764	0.315968	0.474691		1.08177	0.492973		0.517081	0.773596	19.6659	21.5642	58.7699	0.133346	23.8118
LIL 11/18/15 35 Sats+Aroms	35		268.75		-29.2318		0.683575		84.27	0.01	0.32	0.39	0.04	428	76	93	0.42	5.41		LIL 11/18/15 35 Sats+Aroms	35	268.75		0.883655	10.6562		14.7044	0.0278877	0.15057	0.026743	0.321364	0.149856		1.40103	0.526565		0.628104	0.809887	18.3781	21.6935	59.9284	0.183346	23.5937		-32.038	0.0798999		-31.2833	0.0332916
LIL 11/18/15 34 Sats+Aroms	34		259		-29.0649		0.716502		58.57	0	0.05	0.17	0.01	425	71	243	0.07	7.39		LIL 11/18/15 34 Sats+Aroms	34	259		0.86438	9.57217		13.4924	0.0118697	0.0996809	0.0357062	0.240497	0.320089		1.21815	0.387754		0.578451	0.607821	17.0434	21.2472	61.7094	0.162016	19.1017		-32.2673	0.186527		-31.962	0.0340441
LIL 11/18/15 33 Sats+Aroms	33		246		-29.8043		0.639489		100.46	0.05	0.67	0.22	0.07	422	103	34	0.65	1.59		LIL 11/18/15 33 Sats+Aroms	33	246		1.11497	13.417		18.992	0.0874266	0.296979	0.0721609	0.456868	0.18772		2.08	0.913435		1.19326	1.05189	18.4507	20.7894	60.7599	1.13489	28.8109		-33.163	0.0937443		-32.9603	0.227617
LIL 11/18/15 32 Sats+Aroms	32		238.5		-30.5077		0.733385		65.6	0.05	0.95	0.09	0.05	425	151	14	0.63	2.19		LIL 11/18/15 32 Sats+Aroms	32	238.5		1.0039	12.8292		5.26817	0.091614	0.388297	0.302134	2.39852	0.629562		3.5605	3.18056		3.53317	2.35589	25.2346	33.7613	41.0041	4.07223	29.2088		-34.4082	0.287155		-34.1825	0.278249
LIL 11/18/15 30 Sats+Aroms	30		234		-29.6386		0.296024		53.94	0.01	0.34	0.07	0.03	430	68	14	0.5	2.83		LIL 11/18/15 30 Sats+Aroms	30	234		0.686862	13.4424		3.72781	0.1259	0.26011	1.06637	2.95885	2.76254		5.87598	8.95644		3.33218	1.19056	23.3473	20.9738	55.6789	0.168215	16.9353		-33.9112	0.439811		-32.4313	0.245157
LIL 11/18/15 29 Sats+Aroms	29		230		-30.6668		0.972962		72.32	0	0.07	0.21	0.05	427	17	51	0.41	4.76		LIL 11/18/15 29 Sats+Aroms	29	230		0.462795	10.8031		6.20015	0.203855	0.532934	0.224552	5.65611	0.304772		5.08479	4.41123		2.57983	0.573139	14.9051	9.39695	75.698	0.101471	54.3979		-33.6893	0.110074		-33.9025	0.464569
LIL 11/18/15 28 Sats+Aroms	28		225		-26.8188		0.149917		78.47	0.03	1.18	0.41	0.03	431	140	49	0.84	2.76		LIL 11/18/15 28 Sats+Aroms	28	225		0.691582	17.2048		2.83979	0.0950689	0.300578	1.16448	2.4576	2.94322		12.7925	6.61745		3.60468	1.96544	23.3489	18.1193	58.5318	0.471794	15.0377
LIL 11/18/15 27 Sats+Aroms	27		220.5		-22.621		0.108666													LIL 11/18/15 27 Sats+Aroms	27	220.5		0.342146	11.8339		1.07434	0.221038	0.556479	2.10504	4.63704	2.70738		19.1167	4.01772		1.86059	0.870105	20.8638	20.083	59.0532	0.229344	11.097		-31.6013	0.201505		-31.4157	0.314136
LIL 11/18/15 26 Sats+Aroms	26		217.5			-24.5038	0.0882745													LIL 11/18/15 26 Sats+Aroms	26	217.5		0.547267	17.3298		2.92966	0	0	36.0041	0.961159			28.6986	7.51959		4.60055	1.04215	20.3933	18.1791	61.4275	0.200426	17.3386
LIL 11/18/15 25 Sats+Aroms	25		213.5		-24.1969		0.082232													LIL 11/18/15 25 Sats+Aroms	25	213.5		0.492863	19.4297		2.54556	0	0	26.6024	0.714158			19.7771	36.9653		4.03527	2.17586	18.5966	20.373	61.0304	0.250921	19.8557
LIL 11/18/15 24 Sats+Aroms	24		210			-26.3909	0.096713													LIL 11/18/15 24 Sats+Aroms	24	210		0.184972	17.9349		2.91191	0	0	2.56585	0			11.9805	27.3165		4.34245	1.28658	21.4428	16.7668	61.7903	0.210569	17.8176
LIL 11/18/15 23 Sats+Aroms	23		207.25																	LIL 11/18/15 23 Sats+Aroms	23	207.25		0.610903	17.6851		3.34648	0	0	4.40701	0			11.3236	2.56585		4.82073	2.4661	26.755	15.0179	58.2271	0.46659	14.7762
LIL 11/18/15 22 Sats+Aroms	22		204.75			-23.7082	0.131406													LIL 11/18/15 22 Sats+Aroms	22	204.75		0.12126	15.908		3.70574	0	0	8.45616	0			6.83117	4.40701		4.14615	2.4782	25.0652	14.4719	60.4629	0.440113	12.7485
LIL 11/18/15 21 Sats+Aroms	21		202		-24.2483		0.0883535													LIL 11/18/15 21 Sats+Aroms	21	202		#DIV/0!	21.3498		4.01326	0	0	2.5809	0			6.21912	8.45616		3.71583	1.06345	19.7389	15.6135	64.6476	0.254142	17.7486
LIL 11/18/15 20 Sats+Aroms	20		193.75		-25.0026		0.0640237													LIL 11/18/15 20 Sats+Aroms	20	193.75		#DIV/0!	11.5571		3.65282	0	0	7.38892	0						5.12634	1.62927	24.9385	11.2137	63.8478	0.277486	14.1495
LIL 11/18/15 19 Sats+Aroms	19		176.25		-24.4282		0.168263													LIL 11/18/15 19 Sats+Aroms	19	176.25		0.58267	18.381		6.27794	0	0	5.46533	0.250782						1.76588	2.79867	25.9529	18.5751	55.472	0.406661	22.6501
LIL 11/18/15 18 Sats+Aroms	18		155		-24.5054		0.127791													LIL 11/18/15 18 Sats+Aroms	18	155		1.1012	17.3319		6.74405	0	0	7.88032	1.36105						1.80802	2.86239	25.3427	17.2183	57.439	0.808515	23.8274
LIL 11/18/15 17 Sats+Aroms	17		140		-24.7959		0.187787													LIL 11/18/15 17 Sats+Aroms	17	140		0.995333	16.2587		7.77389	0	0	5.75586	0.716011						2.03224	1.64376	22.4555	18.6084	58.9361	0.458113	25.3267
LIL 11/18/15 16 Sats+Aroms	16		125		-25.1164		0.00507													LIL 11/18/15 16 Sats+Aroms	16	125		1.12988	17.2053		6.18888	0	0	5.35934	0.764438						2.2667	1.63644	22.1378	16.806	61.0561	0.615531	22.4388
LIL 11/18/15 15 Sats+Aroms	15		106		-23.2232		0.137439													LIL 11/18/15 15 Sats+Aroms	15	106		1.26032	22.0437		6.196	0	0	17.9009	3.93534						1.87147	2.51747	22.3636	17.0054	60.631	0.740545	20.8278
LIL 11/18/15 14 Sats+Aroms	14		93		-25.0736		0.118137													LIL 11/18/15 14 Sats+Aroms	14	93		1.3042	14.8189		7.34345	0.279868	0.209546	20.1172	1.50523						1.80545	3.15724	28.1674	17.4451	54.3874	1.01179	21.1752
LIL 11/18/15 13 Sats+Aroms	13		85		-24.7148		0.246846													LIL 11/18/15 13 Sats+Aroms	13	85		0.739753	14.7377		5.70217	0.315631	0.369368	26.9213	1.41474						2.19951	2.47362	59.5004	9.7621	30.7375	0.854889	30.2556
LIL 11/18/15 12 Sats+Aroms	12		79		-26.1963		-0.00842													LIL 11/18/15 12 Sats+Aroms	12	79		1.18149	14.9053		13.9518	0.471863	0.369702	79.9819	2.16573						1.3385	3.18761	37.572	17.7972	44.6308	2.06299	24.7587
LIL 11/18/15 11 Sats+Aroms	11		67.5		-25.8905		0.348416													LIL 11/18/15 11 Sats+Aroms	11	67.5		1.12981	14.5731		12.031	0.577604	0.412139	71.7628	2.52195						1.46321	2.94055	48.7731	15.3293	35.8976	1.69187	28.1351
LIL 11/18/15 10 Sats+Aroms	10		51.25		-25.6952		0.315169													LIL 11/18/15 10 Sats+Aroms	10	51.25		1.33681	13.4389		10.185	0.475435	0.469456	65.6811	2.43257						1.5426	2.73496	34.1981	14.9089	50.8931	1.3324	24.5128
LIL 11/18/15 9 Sats+Aroms	9		40		-25.0979		0.148238													LIL 11/18/15 9 Sats+Aroms	9	40		0.855236	13.8793		7.15658	0.797425	0.677538	84.906	4.24586						1.90751	2.29129	31.3478	11.9778	56.6744	1.10418	26.6805
LIL 11/18/15 8 Sats+Aroms	8		29.75		-21.494		0.117076													LIL 11/18/15 8 Sats+Aroms	8	29.75		0.666796	13.9108		7.19785	1.1155	1.06225	121.62	6.50632						1.54238	3.46424	26.564	12.5096	60.9265	1.23461	27.5163
LIL 11/18/15 7 Sats+Aroms	7		17		-24.2241		0.0864356		71.51	0	0.02	0.21	0.06	426	7	78	0.27	4.97		LIL 11/18/15 7 Sats+Aroms	7	17		0.867536	10.3863		9.56098	0.741282	0.791374	111.277	3.14796						1.22324	4.53336	35.5659	17.021	47.4131	2.06697	23.1339
LIL 11/18/15 7 Sats+Aroms	6		5		-26.1624		1.22413													LIL 11/18/15 7 Sats+Aroms	6	5

## Sheet: G49560
Fox, C.P., et al., 2022, Two-pronged kill mechanism at the end-Triassic mass extinction: Geology, https://doi.org/10.1130/G49560.1
